# Supplementary material
Source: publisher site journal article supplement (https://www.dovepress.com/get_supplementary_file.php?f=441981.docx)
Supplement: Supplementary file 1 [file get_supplementary_file.php]

| Supplementary Table 1 Demographics and clinical characteristics of surgical cohort | | | | | | | | |
| --- | --- | --- | --- | --- | --- | --- | --- | --- |
|  | Training set (n=174) | |  | Validation set (n=66) | | |  | |
| Characteristics | **L-NETs (n=87)** | **H-NETs (n=87)** | P value | **L-NETs (n=33)** | | **H-NETs (n=33)** | | P value |
| Gender | n=87 (%) | n=87 (%) | 0.8723 | n=33 (%) | | n=33 (%) | | 0.8050 |
| Male | 59 (67.8) | 57 (65.5) |  | 14 (42.4) | | 16 (48.5) | |  |
| Female | 28 (32.2) | 30 (34.5) |  | 19 (57.6) | | 17 (51.5) | |  |
| Age(years) | n=87 (%) | n=87 (%) | 0.6476 | n=33 (%) | n=33 (%) | | | 0.3248 |
| < 65 | 41 (47.1) | 37 (42.5) |  | 14 (42.4) | 19 (57.6) | | |  |
| ≥ 65 | 46 (52.9) | 50 (57.5) |  | 19 (57.6) | 14 (42.4) | | |  |
| pT | n=87 (%) | n=87 (%) | 0.0560 | n=33 (%) | | n=33 (%) | | 0.1247 |
| pT1 | 0 | 0 |  | 0 | | 0 | |  |
| pT2 | 6 (6.9) | 3 (3.4) |  | 5 (15.2) | | 3 (9.1) | |  |
| pT3 | 46 (52.9) | 37 (42.5) |  | 19 (57.6) | | 15 (45.5) | |  |
| pT4 | 35 (40.2) | 47 (54) |  | 9 (27.3) | | 15 (45.5) | |  |
| pN | n=87 (%) | n=87 (%) | 0.0032 | n=33 (%) | | n=33 (%) | | 0.0464 |
| pN0 | 45 (51.7) | 26 (29.9) |  | 15 (45.5) | | 11 (33.3) | |  |
| pN1 | 25 (28.7) | 32 (36.8) |  | 13 (39.4) | | 7 (21.2) | |  |
| pN2 | 17 (19.5) | 29 (33.3) |  | 5 (15.2) | | 15 (45.5) | |  |
| TNM Stage* | n=87 (%) | n=87 (%) | 0.0053 | n=33 (%) | | n=33 (%) | | 0.4502 |
| II | 45 (51.7) | 26 (29.9) |  | 15 (45.5) | | 11 (33.3) | |  |
| III | 42 (48.3) | 61 (70.1) |  | 18 (54.5) | | 22 (66.7) | |  |
| Tumor grade | n=87 (%) | n=87 (%) | >0.9999 | n=33 (%) | | n=33 (%) | | >0.9999 |
| G1/2 | 71 (81.6) | 72 (82.8) |  | 28 (84.8) | | 27 (81.8) | |  |
| G3 | 16 (18.4) | 15 (17.2) |  | 5 (15.2) | | 6 (18.2) | |  |
| Perineural invasion | n=87 (%) | n=87 (%) | >0.9999 | n=33 (%) | | n=33 (%) | | 0.6203 |
| No | 63 (72.4) | 64 (73.6) |  | 20 (60.6) | | 17 (51.5) | |  |
| Yes | 24 (27.6) | 23 (26.4) |  | 13 (39.4) | | 16 (48.5) | |  |
| Vascular invasion | n=87 (%) | n=87 (%) | >0.9999 | n=33 (%) | | n=33 (%) | | 0.4586 |
| No | 75 (86.2) | 76 (87.4) |  | 16 (48.5) | | 20 (60.6) | |  |
| Yes | 12 (13.8) | 11 (12.6) |  | 17 (51.5) | | 13 (39.4) | |  |
| NLR | n=87 (%) | n=87 (%) | 0.0334 | n=33 (%) | | n=33 (%) | | 0.0063 |
| Low | 52 (59.8) | 37 (42.5) |  | 22 (66.7) | | 10 (30.3) | |  |
| High | 35 (40.2) | 50 (57.5) |  | 11 (33.3) | | 23 (69.7) | |  |
| H-NETs, high NETs density; L-NETs, low NETs density. *The 8th AJCC TNM staging system | | | | | | | | |

| Supplementary Table 2 Relationship between NETs in pretreatment biopsy clinicopathological characteristics | | | |
| --- | --- | --- | --- |
| nCRT set (n=153) | | | |
| Characteristics | **L-NETs (n=77)** | **H-NETs (n=76)** | P value |
| Gender | n = 77 (%) | n = 76 (%) | 0.259 |
| Male | 41 (53.2) | 33 (43.4) |  |
| Female | 36 (46.8) | 43 (56.5) |  |
| Age(years) | n = 77 (%) | n = 76 (%) | 0.516 |
| < 65 | 46 (59.7) | 41 (53.9) |  |
| ≥65 | 31 (40.3) | 35 (46.1) |  |
| Tumor grade | n = 77 (%) | n = 76 (%) | 0.140 |
| G1/ 2 | 71 (92.2) | 64 (84.2) |  |
| G3 | 6 (7.8) | 12 (15.8) |  |
| NLR | n = 77 (%) | n = 76 (%) | 0.330 |
| Low | 40 (51.9) | 46 (60.5) |  |
| High | 37 (48.1) | 30 (39.5) |  |
| Neoadjuvant therapy | n = 77 (%) | n = 76 (%) | 0.744 |
| Chemotherapy | 31 (40.3) | 33 (43.4) |  |
| Chemoradiotherapy | 46 (59.7) | 43 (56.6) |  |
| TRS | n = 77 (%) | n = 76 (%) | 0.003 |
| TRS 0/1 | 43 (55.8) | 24 (31.6) |  |
| TRS 2/3 | 34 (44.2) | 52 (68.4) |  |
| pCR | n = 77 (%) | n = 76 (%) | 0.020 |
| Yes | 20 (26.0) | 8 (10.5) |  |
| No | 57 (74.0) | 68 (89.5) |  |
| H-NETs, high NETs density; L-NETs, low NETs density | | | |

|  | **H-NETs** (n=76) | |  | **L-NETs** (n=77) | |  | |
| --- | --- | --- | --- | --- | --- | --- | --- |
| Characteristics | Response (n=24) | Nonresponse (n=52) | P value | Response (n=43) | Nonresponse (n=34) | P value | |
| Neoadjuvant therapy | n=24 (%) | n=52 (%) | 0.1348 | n=43 (%) | n=34 (%) | 0.0614 | |
| Chemotherapy | 7 (29.2) | 26 (50.0) |  | 13 (30.2) | 18 (52.9) |  |
| Chemoradiotherapy | 17 (70.8) | 26 (50.0) |  | 30 (69.8) | 16 (47.1) |  |
| NLR | n=24 (%) | n=52 (%) | <0.001 | n=43 (%) | n=34 (%) | 0.8206 |
| Low | 24 (100) | 22 (42.3) |  | 23 (53.5) | 17 (50) |  |
| High | 0 | 30 (57.7) |  | 20 (46.5) | 17 (50) |  | |

Supplementary Table 3 Analysis of factors affecting response rate in different NET groups

H-NETs, high NETs density; L-NETs, low NETs density

**Supplementary Figure 1** GO, KEGG functional enrichment analysis between different NET density groups. (A-C) GO function enrichment of the DEGs. (D) KEGG pathway enrichment of the DEGs.
